# Supplementary material for: Chemo-radiotherapy with 177Lu-PLGA(RGF)-CXCR4L for the targeted treatment of colorectal cancer
Source: PubMed Central journal article supplement (PMC10292846; doi:10.3389/fmed.2023.1191315), 2023-06-12
Supplement: Data_Sheet_1.pdf [file Data_Sheet_1.pdf]

# Chemo-radiotherapy with $^{177}\text{Lu}$ -PLGA(RGF)-CXCR4L for the targeted treatment of colorectal cancer

Pedro Cruz-Nova<sup>1</sup>, Brenda Gibbens-Bandala<sup>1\*</sup>, Alejandra Ancira-Cortez<sup>1</sup>, Gerardo Ramírez-Nava<sup>2</sup>, Clara Santos-Cuevas<sup>1</sup>, Myrna Luna-Gutiérrez<sup>1</sup>, Blanca Ocampo-García<sup>1\*</sup>.

## Supplementary Material

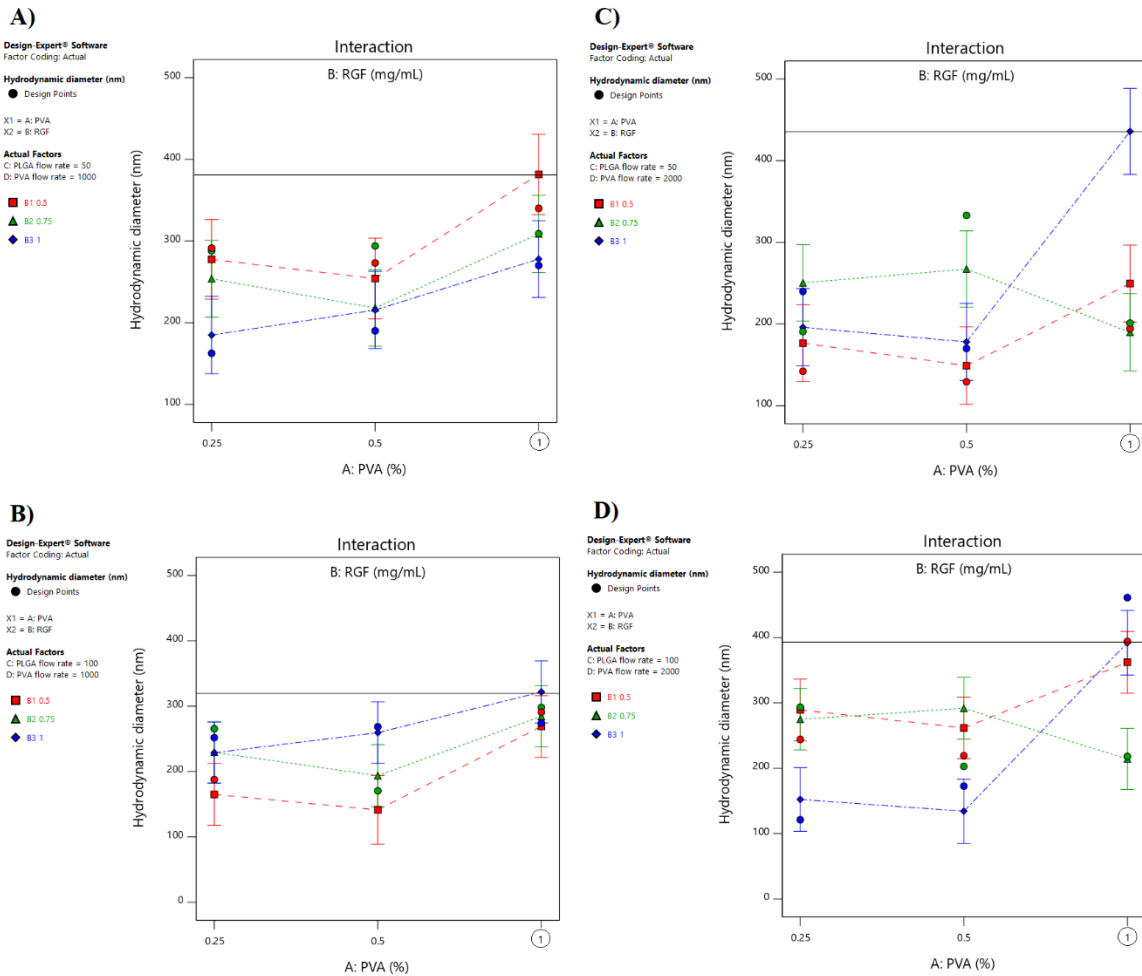

S1: Effect of PVA and RGF concentration and PLGA, PVA flow rate on the hydrodynamic diameter of PLGA(RGF) nanoparticles

A)

Design-Expert® Software

Factor Coding: Actual

Zeta potential (mV)

● Design Points

X1 = A: PVA

X2 = B: RGF

Actual Factors

C: PLGA flow rate = 50

D: PVA flow rate = 1000

■ B1 0.5  
▲ B2 0.75  
◆ B3 1

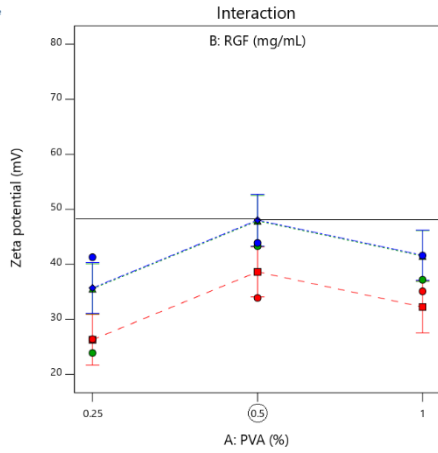

C)

Design-Expert® Software

Factor Coding: Actual

Zeta potential (mV)

● Design Points

X1 = A: PVA

X2 = B: RGF

Actual Factors

C: PLGA flow rate = 50

D: PVA flow rate = 2000

■ B1 0.5  
▲ B2 0.75  
◆ B3 1

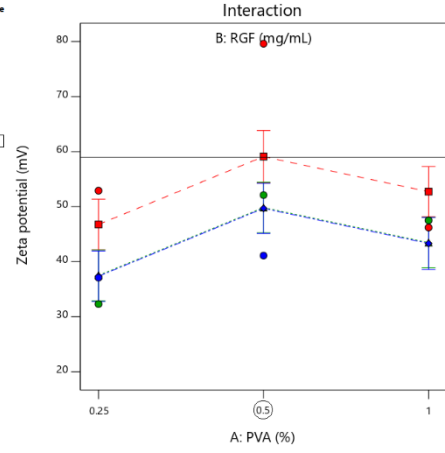

B)

Design-Expert® Software

Factor Coding: Actual

Zeta potential (mV)

● Design Points

X1 = A: PVA

X2 = B: RGF

Actual Factors

C: PLGA flow rate = 100

D: PVA flow rate = 1000

■ B1 0.5  
▲ B2 0.75  
◆ B3 1

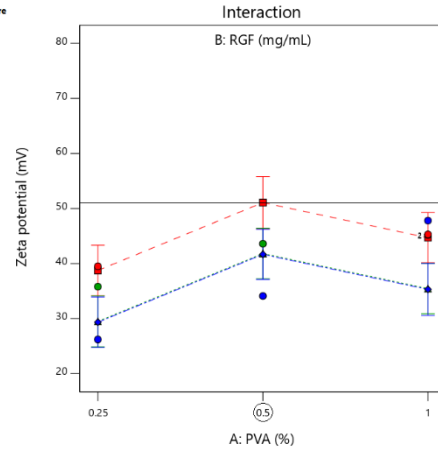

D)

Design-Expert® Software

Factor Coding: Actual

Zeta potential (mV)

● Design Points

X1 = A: PVA

X2 = B: RGF

Actual Factors

C: PLGA flow rate = 100

D: PVA flow rate = 2000

■ B1 0.5  
▲ B2 0.75  
◆ B3 1

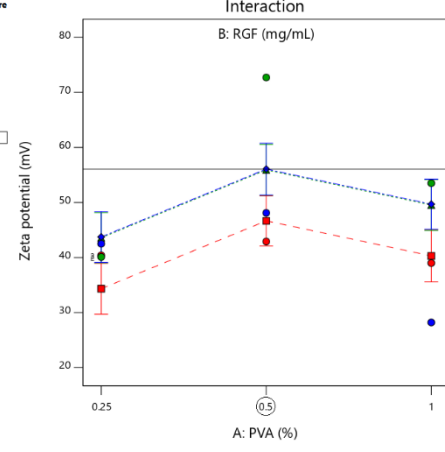

S2: Effect of PVA and RGF concentration and PLGA, PVA flow rate on the  $\zeta$  potential of PLGA(RGF) nanoparticles

**A)**  
Design-Expert® Software  
Factor Coding: Actual

PDI  
● Design Points  
X1 = A: PVA  
X2 = B: RGF  
Actual Factors  
C: PLGA flow rate = 50  
D: PVA flow rate = 1000

■ B1 0.5  
▲ B2 0.75  
◆ B3 1

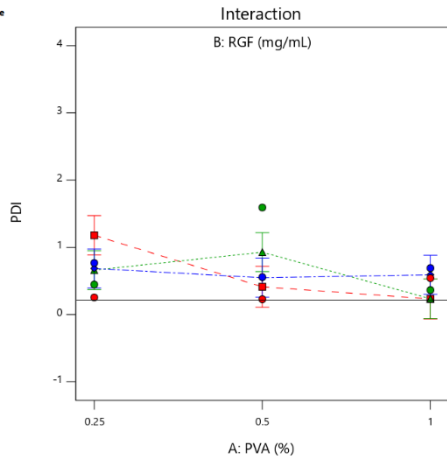

**C)**  
Design-Expert® Software  
Factor Coding: Actual

PDI  
● Design Points  
X1 = A: PVA  
X2 = B: RGF  
Actual Factors  
C: PLGA flow rate = 50  
D: PVA flow rate = 2000

■ B1 0.5  
▲ B2 0.75  
◆ B3 1

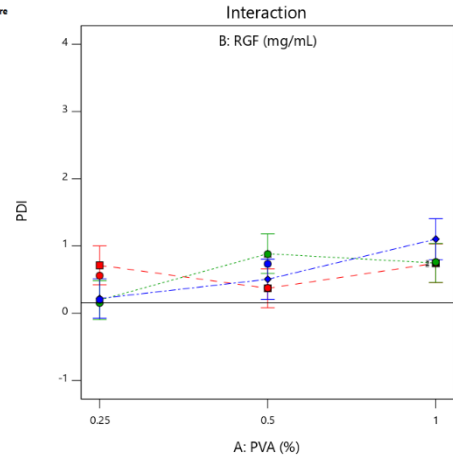

**B)**  
Design-Expert® Software  
Factor Coding: Actual

PDI  
● Design Points  
X1 = A: PVA  
X2 = B: RGF  
Actual Factors  
C: PLGA flow rate = 100  
D: PVA flow rate = 1000

■ B1 0.5  
▲ B2 0.75  
◆ B3 1

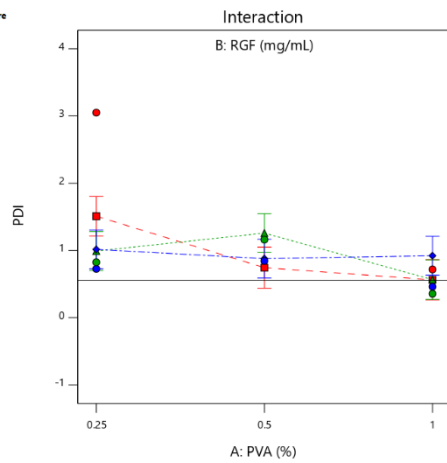

**D)**  
Design-Expert® Software  
Factor Coding: Actual

PDI  
● Design Points  
X1 = A: PVA  
X2 = B: RGF  
Actual Factors  
C: PLGA flow rate = 100  
D: PVA flow rate = 2000

■ B1 0.5  
▲ B2 0.75  
◆ B3 1

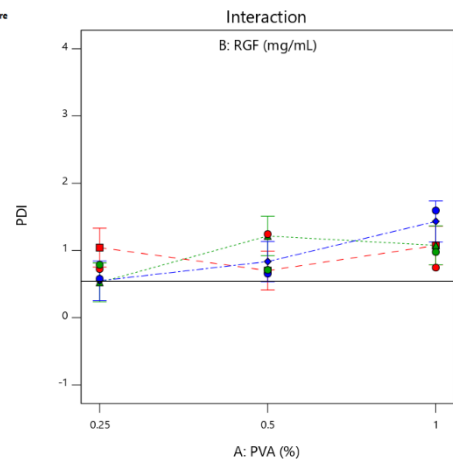

S3: Effect of PVA and RGF concentration and PLGA, PVA flow rate on the PDI of PLGA(RGF) nanoparticles

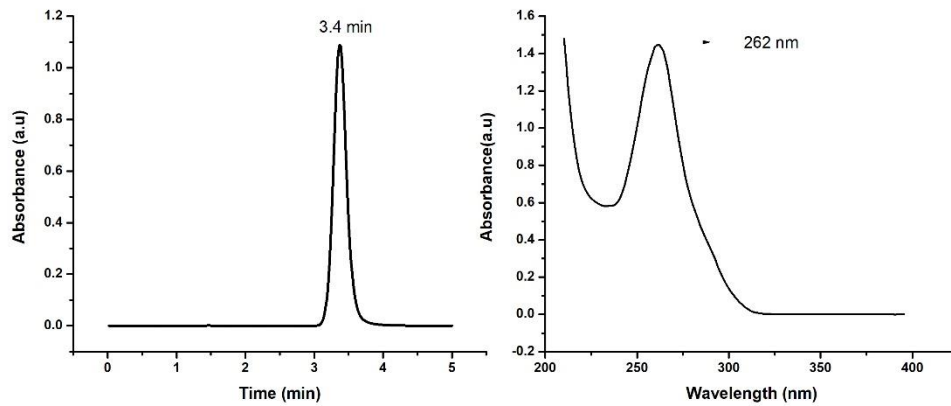

S4: Regorafenib chromatogram and the UV-Vis associated spectrum

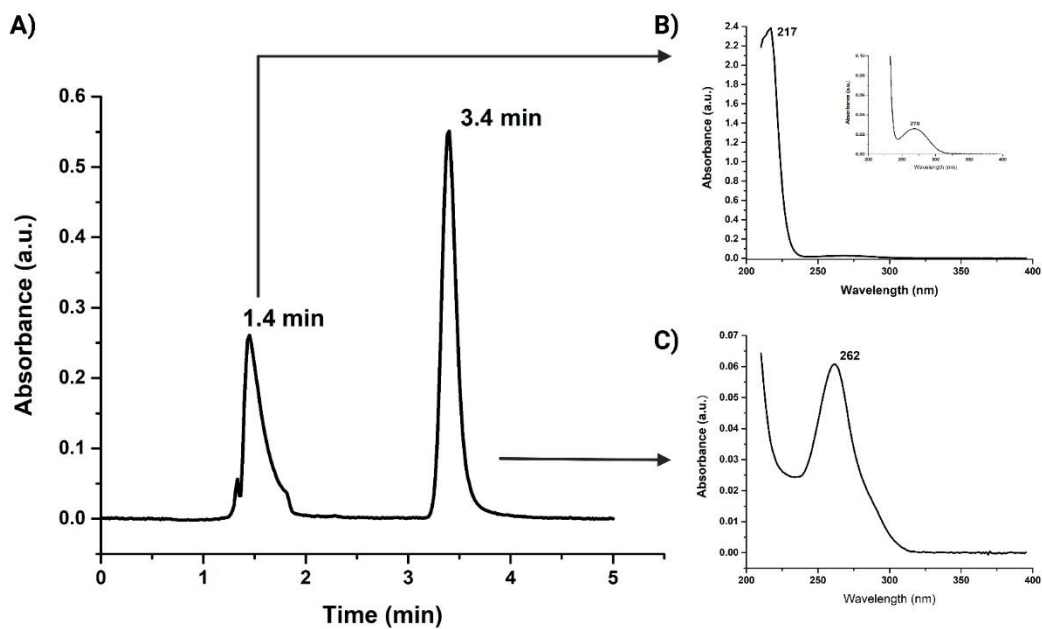

S5: A) Chromatogram of the recovered RGF from PLGA(RGF) nanoparticles. The peak at 1.4 nm corresponds to the UV-Vis spectrum of PLGA fragments (B) and the peak at 3.4 nm corresponds to recovered regorafenib (C). Dilution factor was not applied in B) and C)
